# Supplementary material for: Nanoparticulate iron(III) oxo-hydroxide delivers safe iron that is well absorbed and utilised in humans
Source: PubMed Central journal article supplement (PMC4228177; doi:10.1016/j.nano.2014.06.012), 2014-11
Supplement: mmc2.pdf [file mmc2.pdf]

**Title: Nanoparticulate iron(III) oxo-hydroxide delivers safe iron that is well absorbed and utilised in humans.**

Dora I.A. Pereira, Sylvaine F.A. Bruggaber, Nuno Faria, Mani A. Tagmount, Mohamad F Aslam, David M. Frazer, Chris D. Vulpe, Gregory J. Anderson, and Jonathan J. Powell.

**Supplementary Tables**

**Supplementary Table S1. Composition of the iron deficient basal diet.**

| <b>Ingredient</b>                    | <b>g/kg<sub>diet</sub></b> | <b>Ingredient</b>                    | <b>g/kg<sub>diet</sub></b> | <b>Ingredient</b>           | <b>g/kg<sub>diet</sub></b> |
|--------------------------------------|----------------------------|--------------------------------------|----------------------------|-----------------------------|----------------------------|
| Dried skim milk                      | 650                        | CuSO <sub>4</sub> .5H <sub>2</sub> O | 0.0816                     | Folic acid                  | 0.001                      |
| Sucrose                              | 205                        | Fe <sup>i</sup>                      | ----                       | <i>p</i> -Aminobenzoic acid | 0.01                       |
| Fat (lard)                           | 99                         | Ca                                   | 0.012                      | Biotin                      | 0.0002                     |
|                                      |                            | panthothenate                        |                            | Inositol                    | 0.2                        |
| Dextrose                             | 30                         | Pyridoxine                           | 0.005                      | Vitamin B12                 | 0.0000                     |
| NaCl                                 | 6                          | Riboflavin                           | 0.005                      |                             | 15                         |
| Choline                              | 5                          | Thiamine                             | 0.01                       | Vitamin A                   | 0.008                      |
| dihydrogen citrate                   |                            | hydrochloride                        |                            | palmitate                   |                            |
| NaIO <sub>3</sub> .H <sub>2</sub> O  | 0.660                      | Nicotinic acid                       | 0.01                       | Calciferol                  | 0.001                      |
| MnSO <sub>4</sub> .4H <sub>2</sub> O | 0.324                      | Vitamin K                            | 0.001                      | α-Tocopherol (35%)          | 1 mL                       |

i- the control diet was supplemented with Fe(II) ammonium sulfate and the test diets with Fe(II) sulfate or Nano Fe(III) (a) in the levels presented in supplementary Table S3. [Valberg LS, Taylor KB, Witts LJ, Richards WC. The effect of iron deficiency on the stomach of the rat. Br J Nutr. 1961;15:473-80]

**Supplementary Table S2. Demographics, anthropometric and baseline iron status characteristics of enrolled subjects. Results presented as mean (min,max).**

| Test Compound                            | N  | Age (years)    | BMI (kg/m <sup>2</sup> ) | CRP (mg/dL)        | Serum Ferritin (µg/L) | Haemoglobin (g/dL)   | sTfr (µg/mL)      |
|------------------------------------------|----|----------------|--------------------------|--------------------|-----------------------|----------------------|-------------------|
| Nano Fe(III) (a)                         | 4  | 24<br>(19,40)  | 22.4<br>(17.1, 29.7)     | 2.4<br>(0.7, 6.2)  | 7.7<br>(2.7, 12.6)    | 12.4<br>(11.3, 13)   | 6.9<br>(4.0,17.2) |
| Nano Fe(III) (b)                         | 4  | 23<br>(21,27)  | 22.5<br>(19.6, 28.1)     | 2.2<br>(1.4, 4.4)  | 5.1<br>(3.9, 9.1)     | 12.1<br>(10.8, 12.2) | 5.9<br>(4.1,7.6)  |
| Nano Fe(III) (c)                         | 4  | 25<br>(22,28)  | 20.2<br>(18.8, 26.2)     | 1.4<br>(0.6, 2.2)  | 11.1<br>(2.8, 57.7)   | 12.4<br>(11.5, 13.3) | 4.9<br>(3.3,5.7)  |
| Nano Fe(III) (d)                         | 4  | 23<br>(21, 27) | 22.0<br>(18.1, 27.2)     | 1.8<br>(1.1, 3.6)  | 6.9<br>(2.5, 20.3)    | 12.5<br>(11.5, 13.6) | 7.1<br>(4.4,7.7)  |
| Nano Fe(III) (e)                         | 4  | 28<br>(19,30)  | 22.7<br>(19.4, 24.3)     | 1.1<br>(1.1, 1.15) | 5.0<br>(2.4, 16.3)    | 11.7<br>(10.7, 12.5) | 5.8<br>(3.8,7.7)  |
| Fe(III)(OH) <sub>3</sub> <sup>i</sup>    | 2  | 26<br>(23, 29) | 19.4<br>(18.7, 20.0)     | 2.9<br>(1.1, 4.6)  | 10.5<br>(6.6, 14.5)   | 11.6<br>(11.2, 12.0) | 4.9<br>(4.1,5.6)  |
| FeCl <sub>3</sub> +Tart+Ad <sup>ii</sup> | 4  | 28<br>(24, 33) | 23.1<br>(19.9, 25.4)     | 1.2<br>(1.1, 5.8)  | 13.7<br>(12.8, 23.3)  | 12.0<br>(11.4, 12.8) | 4.0<br>(2.7,5.4)  |
| Fe(II) sulfate                           | 26 | 25<br>(19, 40) | 22.2<br>(17.1, 29.7)     | 2.2<br>(0.62, 5.5) | 9.0<br>(2.2, 56.3)    | 11.9<br>(10.2, 13.2) | 6.2<br>(2.8,13.9) |

i- Refers to standard unmodified Fe(III) oxo-hydroxide (i.e. synthetic 2-line ferrihydrite).

ii- Refers to the unformulated mixture of the raw materials used to synthesise nano Fe(III) (a): Fe(III) chloride, tartaric acid and adipic acid in the molar ratio 2:1:1.

CRP, C-reactive protein; sTfr, soluble transferrin receptor.

**Supplementary Table S3. Fe supplementation level, Fe intake, bodyweight gain and haemoglobin change during 14 days repletion period in rats.**

| <b>Diet/<br/>Group</b>             | <b>N</b> | <b>Diet Fe<br/>content<sup>i</sup><br/>(mg Fe/kg<br/>diet)</b> | <b>Total Fe<br/>intake<br/>(mg/14 d)</b> | <b>Food<br/>intake<sup>ii</sup><br/>(g/ 15 d)</b> | <b>Baseline<br/>Hb<sup>iii</sup><br/>(g/L)</b> | <b>Bodyweight<br/>change<sup>ii</sup><br/>(g/14 d)</b> |
|------------------------------------|----------|----------------------------------------------------------------|------------------------------------------|---------------------------------------------------|------------------------------------------------|--------------------------------------------------------|
| Fe(II) sulfate                     | 3        | 17.9 ± 18.3                                                    | 5.2 ± 0.9                                | 288 ± 50                                          | 55 ± 12                                        | 80 ± 37                                                |
| Nano Fe(III) ( <i>a</i> )          | 3        | 23.8 ± 5.8                                                     | 7.9 ± 0.2                                | 331 ± 9                                           | 59 ± 11                                        | 88 ± 10                                                |
| Reference group<br>(Fe-sufficient) | 3        | 103.7 ±<br>18.8                                                | 38 ± 4                                   | 369 ± 40                                          | 154 ± 7                                        | 87 ± 3                                                 |

- i- As analysed by inductively-coupled plasma optical emission spectroscopy (ICP-OES) following microwave digestion of the prepared diets (n=5 independent digests, n=3 replicates per digest)
- ii- There were no significant differences in the food intake and bodyweight gain for the animals in the test and control diets.
- iii- The baseline haemoglobin was not significantly different between the Fe(II) sulfate and the Nano Fe(III) (*a*) groups, but was significantly lower than the one for the reference group (Fe-sufficient) (p<0.001).

**Supplementary Table S4. Microbial diversity indices computed on all species-based taxonomic units.** Data are mean (SD).

| <b>Diet/Group</b>          | <b>N</b> | <b>Richness (S)</b> | <b>Shannon diversity index (H')</b> | <b>Shannon evenness index (E<sub>H</sub>)</b> | <b>Number of sequences</b> |
|----------------------------|----------|---------------------|-------------------------------------|-----------------------------------------------|----------------------------|
| Day 0 (pre-treatment)      | 6        | 27 (5)              | 1.3 (0.43)                          | 0.40 (0.12)                                   | 5675 (2073)                |
| Fe(II) sulfate at day 14   | 3        | 29 (6)              | 1.9 (0.28)                          | 0.56 (0.05)                                   | 2975 (317)                 |
| Nano Fe(III) (a) at day 14 | 3        | 27 (2)              | 1.5 (0.33)                          | 0.45 (0.09)                                   | 6252 (3139)                |

$H' = -\sum_{i=1}^S pi \ln(pi)$  and  $E_H = \frac{H'}{S}$  where  $S$ , is the total number of species per sample and  $pi$ , is the proportional abundance of each species per sample [Godden JW, Bajorath J. Shannon entropy--a novel concept in molecular descriptor and diversity analysis. J Mol Graph Model. 2000 Feb;18(1):73-6 & Hariri A, Weber B, Olmsted J, 3rd. On the validity of Shannon-information calculations for molecular biological sequences. J Theor Biol. 1990 Nov 21;147(2):235-54].
