# Supplementary material for: Nanoparticulate iron(III) oxo-hydroxide delivers safe iron that is well absorbed and utilised in humans
Source: PubMed Central journal article supplement (PMC4228177; doi:10.1016/j.nano.2014.06.012), 2014-11

**Supplementary Figure S1. Paraffin-embedded section of the small intestine of control animals supplemented with an Fe-sufficient diet. Image shows no detectable iron staining (Perls' Prussian Blue). Scale bar represents 100  $\mu$ m.**

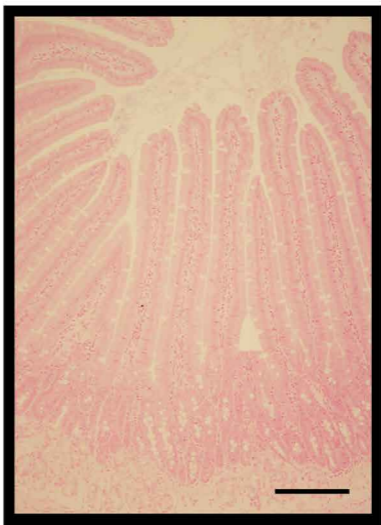

Supplement: mmc3.pdf [file mmc3.pdf]
